# Supplementary material for: Spatial Variations in Microplastics in the Largest Shallow Lake of Central Europe and Its Protecting Wetland Area
Source: MDPI journal article supplement (doi:10.3390/w16071014), 2024-03-31
Supplement: s1 [file s1]

## Supporting information

# Spatial Variations in Microplastics in the Largest Shallow Lake of Central Europe and Its Protecting Wetland Area

Bence Prikler <sup>1,2,†</sup>, Réka Svigruha <sup>3,†</sup>, Judit Háhn <sup>1,\*</sup>, Péter Harkai <sup>1</sup>, István Fodor <sup>3</sup>, Edit Kaszab <sup>1</sup>, Balázs Kriszt <sup>1</sup>, Gergő Tóth <sup>1</sup>, István Szabó <sup>1</sup>, Zsolt Csenki <sup>1</sup>, Gábor Bordós <sup>2</sup>, Adrienn Micsinai <sup>2</sup>, Brigitta Nyíró-Fekete <sup>2</sup>, Zoltán Palotai <sup>2</sup>, Zsófia Lovász <sup>4</sup>, Zsolt Pirger <sup>3,‡</sup> and Sándor Szoboszlay <sup>1,‡</sup>

<sup>1</sup> Institute of Aquaculture and Environmental Safety, Hungarian University of Agriculture and Life Sciences, 2100 Gödöllő, Hungary; prikler.bence@laboratorium.hu (B.P.); harkai.peter@uni-mate.hu (P.H.); kaszab.edit@uni-mate.hu (E.K.); kriszt.balazs@uni-mate.hu (B.K.); toth.gergo@uni-mate.hu (G.T.); szabo.istvan@uni-mate.hu (I.S.); csenki-bakos.zsolt.imre@uni-mate.hu (Z.C.); szoboszlay.sandor@uni-mate.hu (S.S.)

<sup>2</sup> Eurofins Analytical Services Hungary Ltd., 1045 Budapest, Hungary; bordos.gabor@laboratorium.hu (G.B.); micsinai.adrienn@laboratorium.hu (A.M.); feke.te.brigitta@laboratorium.hu (B.N.-F.); palotai.zoltan@laboratorium.hu (Z.P.)

<sup>3</sup> Ecophysiological and Environmental Toxicological Research Group, HUN-REN Balaton Limnological Research Institute, 8237 Tihany, Hungary; svigruha.reka@blki.hu (R.S.); fodor.istvan@blki.hu (I.F.); pirger.zsolt@blki.hu (Z.P.)

<sup>4</sup> Western Transdanubia Water Directorate, 9700 Szombathely, Hungary; lovasz.zsofia@nyuduvizig.hu

\* Correspondence: hahn.judit@uni-mate.hu

† These authors contributed equally to this work.

‡ These authors contributed equally to this work.

(A)

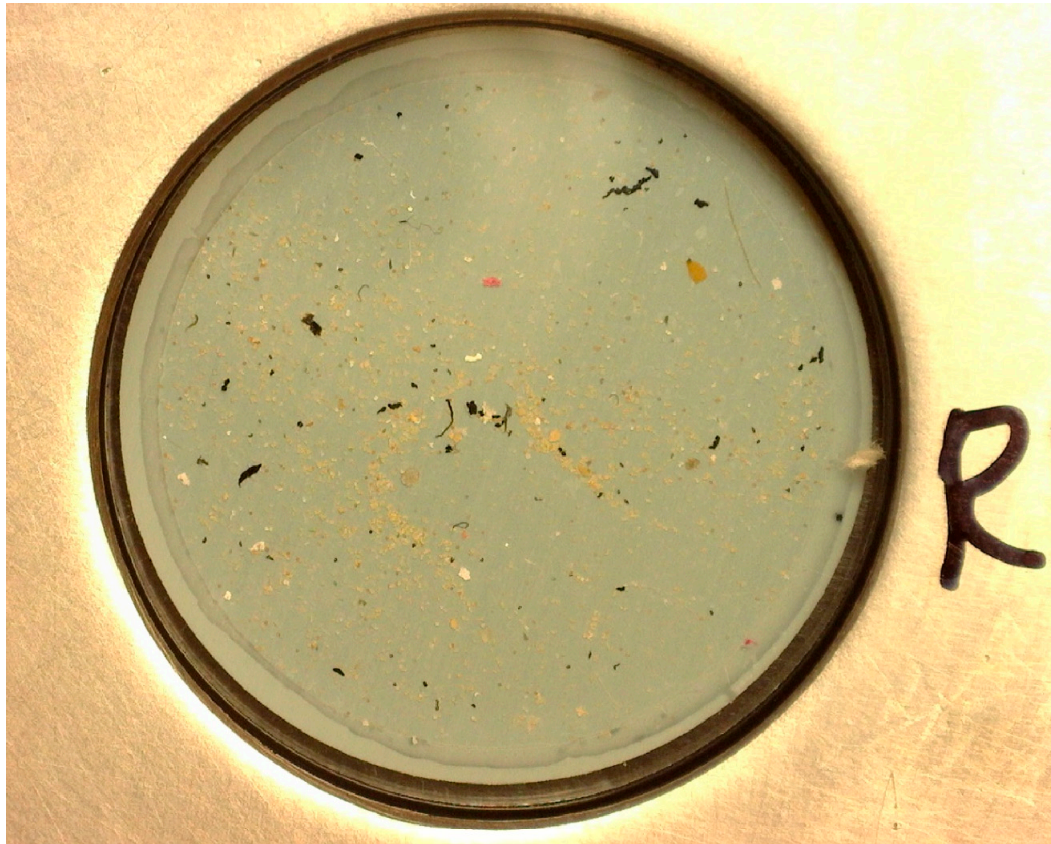

(B)

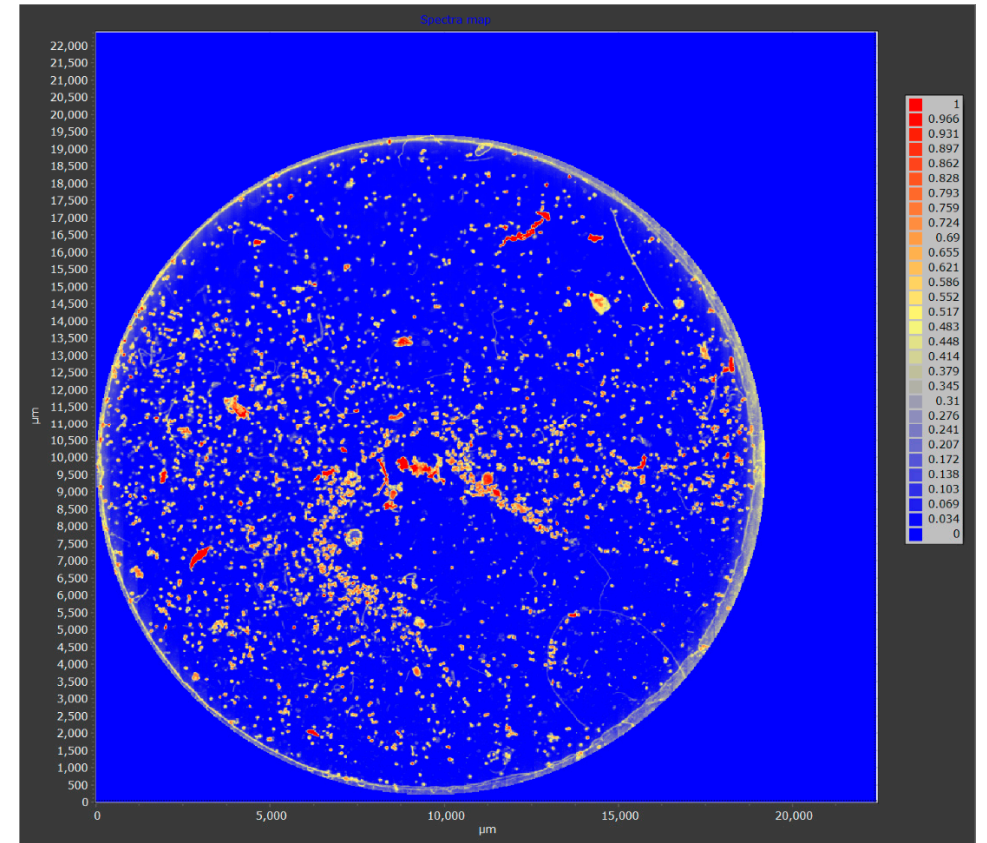

(C)

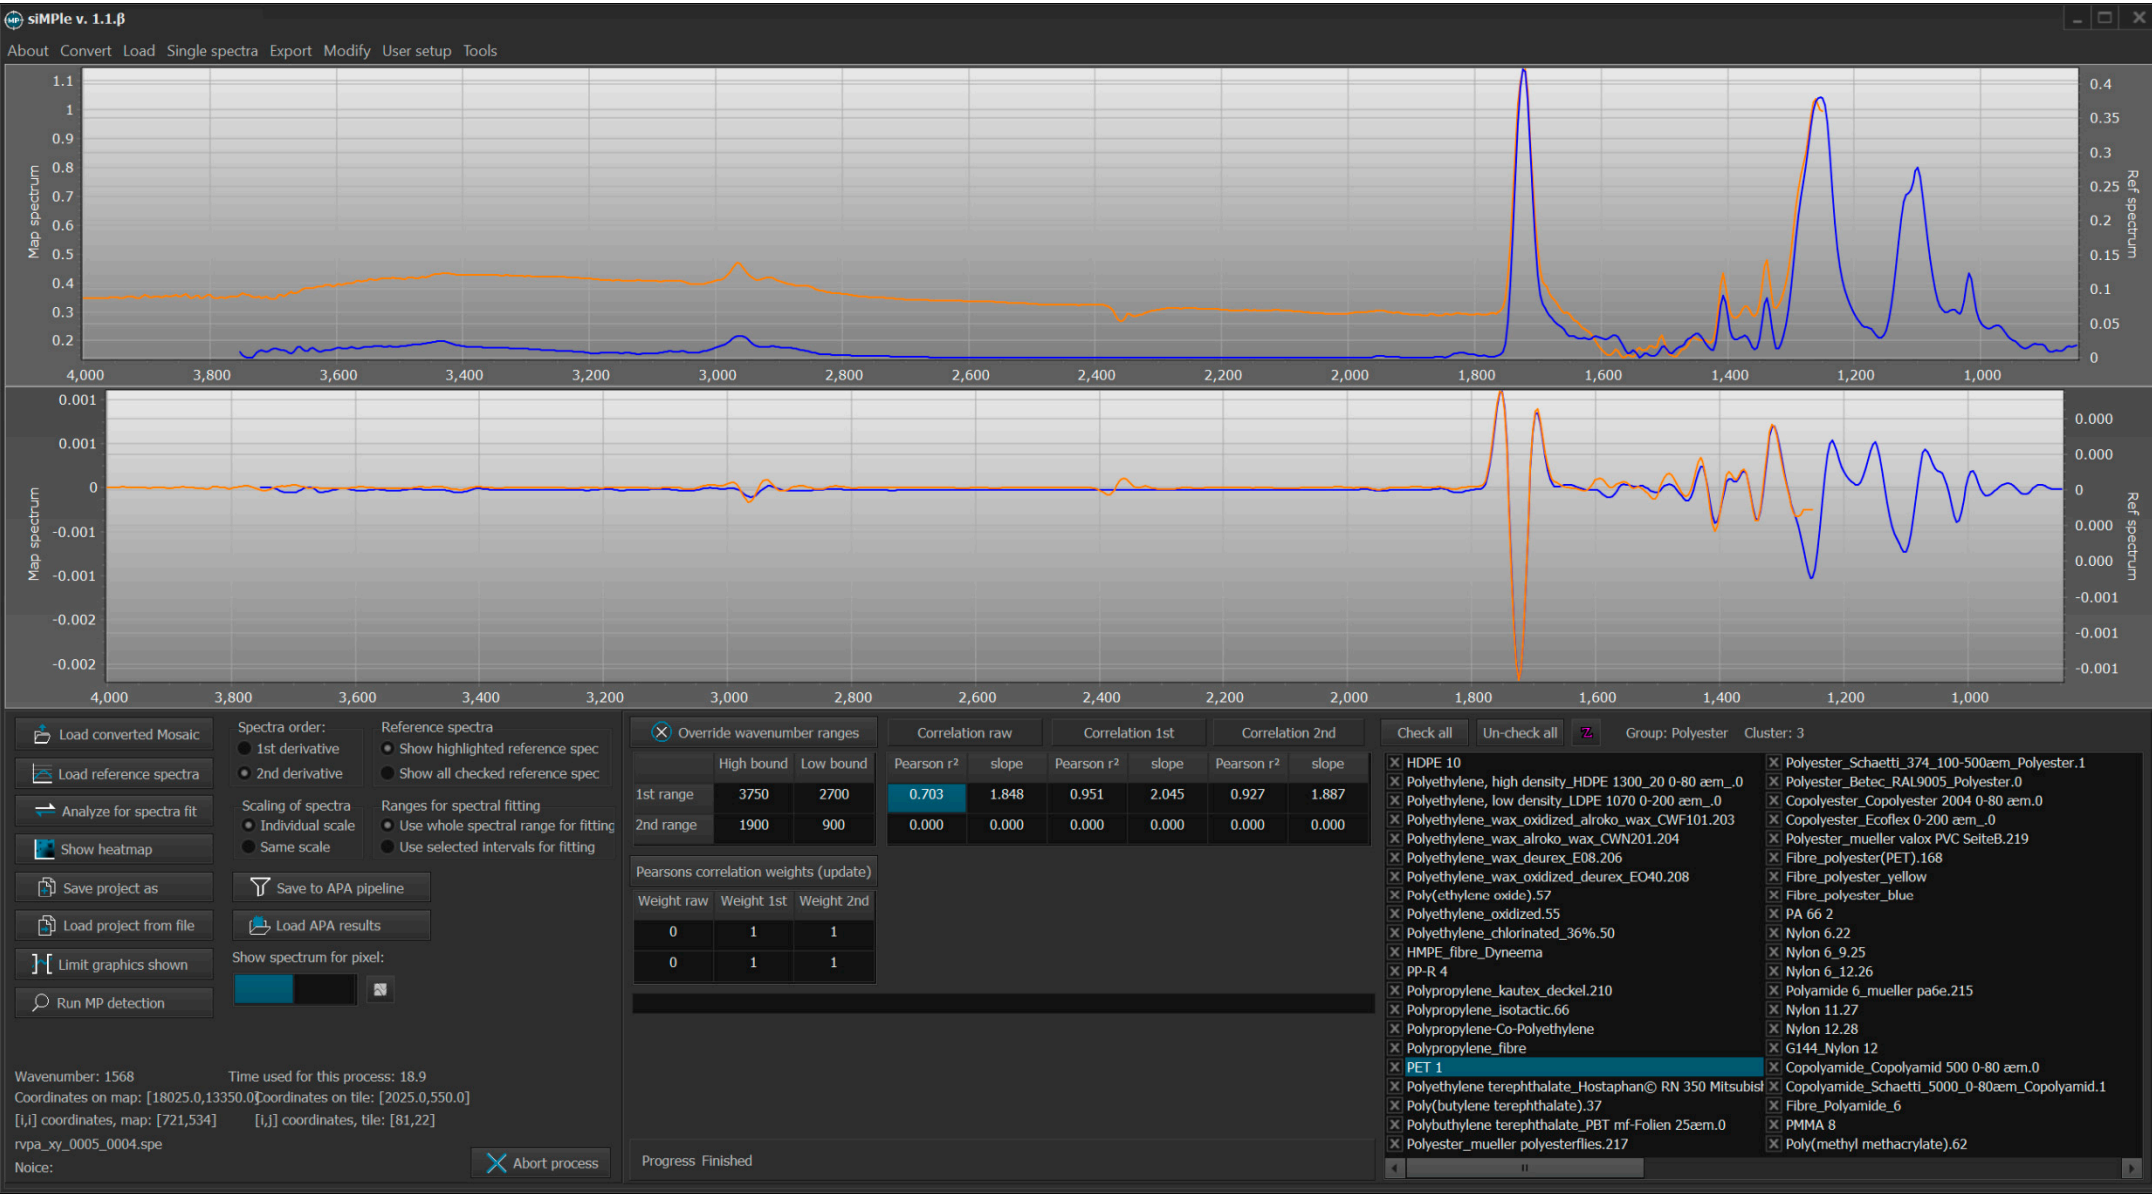

(D)

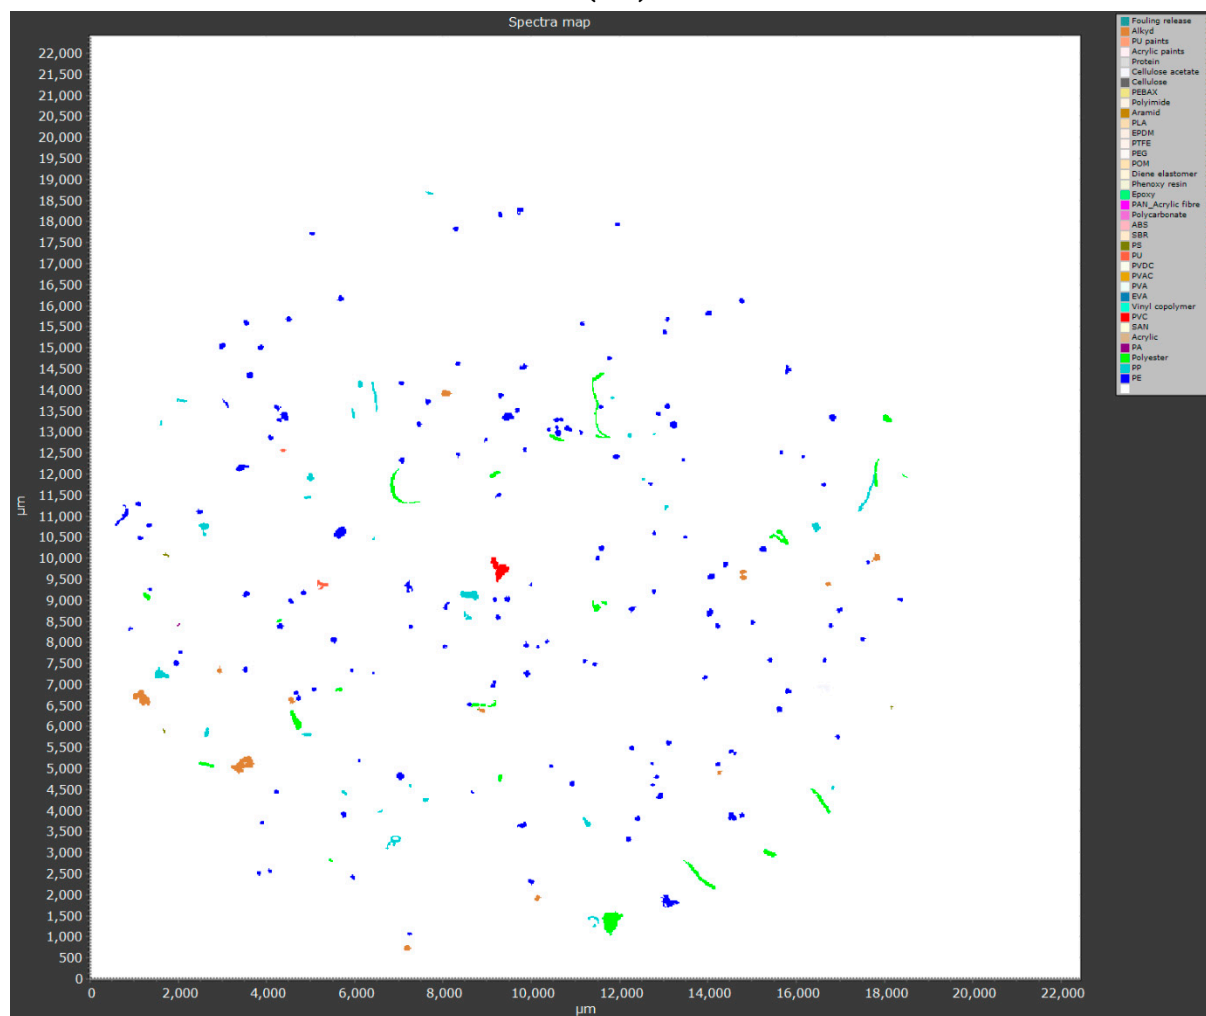

**Supplementary Figure S1:** (A) The digital picture from the LB-4 sample presented by Dino-Lite Edge AM4115TL; (B) The collected spectra intensity of LB-4 are represented in the false color intensity map generated by siMPle software (Version 1.1.β), after the data collection by the FTIR microscope (Nicolet™ In10 MX; Thermo Fisher Scientific, USA); (C) The data evaluation for LB-4 sample was done automatically by the by siMPle software (Version 1.1.β), where all individual spectra were compared to library spectrum in the software, orange spectrum represents, the spectrum coming from the sample, while blue spectrum represents, spectrum coming from the library; (D) A false color microplastic map of LB-4 sample created by the software, where each color represents other kind of polymers.
