# Supplementary material for: Spatial Variations in Microplastics in the Largest Shallow Lake of Central Europe and Its Protecting Wetland Area
Source: MDPI journal article supplement (doi:10.3390/w16071014), 2024-03-31
Supplement: s1 [file s1]

# Supporting information

## Spatial Variations in Microplastics in the Largest Shallow Lake of Central Europe and Its Protecting Wetland Area

Bence Prikler <sup>1,2,†</sup>, Réka Svigruha <sup>3,†</sup>, Judit Háhn <sup>1,\*</sup>, Péter Harkai <sup>1</sup>, István Fodor <sup>3</sup>, Edit Kaszab <sup>1</sup>, Balázs Kriszt <sup>1</sup>, Gergő Tóth <sup>1</sup>, István Szabó <sup>1</sup>, Zolt Csenki <sup>1</sup>, Gábor Bordós <sup>2</sup>, Adrienn Micsinai <sup>2</sup>, Brigitta Nyíró-Fekete <sup>2</sup>, Zoltán Palotai <sup>2</sup>, Zsófia Lovász <sup>4</sup>, Zsolt Pirger <sup>3,‡</sup> and Sándor Szoboszlay <sup>1,‡</sup>

<sup>1</sup> Institute of Aquaculture and Environmental Safety, Hungarian University of Agriculture and Life Sciences, 2100 Gödöllő, Hungary; prikler.bence@laboratorium.hu (B.P.); harkai.peter@uni-mate.hu (P.H.); kaszab.edit@uni-mate.hu (E.K.); kriszt.balazs@uni-mate.hu (B.K.); toth.gergo@uni-mate.hu (G.T.); szabo.istvan@uni-mate.hu (I.S.); csenki-bakos.zsolt.imre@uni-mate.hu (Z.C.); szoboszlay.sandor@uni-mate.hu (S.S.)

<sup>2</sup> Eurofins Analytical Services Hungary Ltd., 1045 Budapest, Hungary; bordos.gabor@laboratorium.hu (G.B.); micsinai.adrienn@laboratorium.hu (A.M.); feke.te.brigitta@laboratorium.hu (B.N.-F.); palotai.zoltan@laboratorium.hu (Z.P.)

<sup>3</sup> Ecophysiological and Environmental Toxicological Research Group, HUN-REN Balaton Limnological Research Institute, 8237 Tihany, Hungary; svigruha.reka@blki.hu (R.S.); fodor.istvan@blki.hu (I.F.); pirger.zsolt@blki.hu (Z.P.)

<sup>4</sup> Western Transdanubia Water Directorate, 9700 Szombathely, Hungary; lovasz.zsofia@nyuduvizig.hu

\* Correspondence: hahn.judit@uni-mate.hu

† These authors contributed equally to this work.

‡ These authors contributed equally to this work.

(A)

|                           | MPs/Blank samples |         |         |         |
|---------------------------|-------------------|---------|---------|---------|
| Polymer types             | Blank 1           | Blank 2 | Blank 3 | Blank 4 |
| PE                        | 1.00              | 0.00    | 2.00    | 0.00    |
| PP                        | 3.00              | 0.00    | 0.00    | 0.00    |
| PS                        | 0.00              | 0.00    | 1.00    | 0.00    |
| Cellulose acetate         | 0.00              | 0.00    | 0.00    | 1.00    |
| Sum                       | 4.00              | 0.00    | 3.00    | 1.00    |
| Average                   | 2.00              |         |         |         |
| Standard Deviation (S.D.) | 1.58              |         |         |         |
| LOD (average + 3.3xS.D.)  | 7.22              |         |         |         |
| LOQ (average + 10xS.D.)   | 17.81             |         |         |         |

(B)

| Sample code       | KB-1 | KB-2   | KB-3 | KB-4  | KB-5  | KB-6  | KB-7   | LB-1 | LB-3  | LB-3  | LB-4  | LB-5   | LB-6  | LB-7  | LB-8  |
|-------------------|------|--------|------|-------|-------|-------|--------|------|-------|-------|-------|--------|-------|-------|-------|
| Sample volume (L) | 1988 | 1347   | 2010 | 2004  | 2001  | 2101  | 2032   | 2002 | 2003  | 2003  | 2002  | 2003   | 2002  | 2002  | 2000  |
| PE                | 3.00 | 160.00 | 1.00 | 23.00 | 15.00 | 3.00  | 343.00 | 1.00 | 61.00 | 14.00 | 8.00  | 139.00 | 21.00 | 1.00  | 11.00 |
| PP                | 0.00 | 21.00  | 7.00 | 0.00  | 3.00  | 6.00  | 48.00  | 1.00 | 12.00 | 14.00 | 12.00 | 25.00  | 19.00 | 6.00  | 17.00 |
| Polyester         | 0.00 | 2.00   | 0.00 | 0.00  | 0.00  | 1.00  | 0.00   | 0.00 | 1.00  | 16.00 | 0.00  | 29.00  | 4.00  | 0.00  | 1.00  |
| PA                | 0.00 | 0.00   | 0.00 | 0.00  | 0.00  | 0.00  | 0.00   | 0.00 | 0.00  | 0.00  | 0.00  | 1.00   | 1.00  | 0.00  | 0.00  |
| Acrylic           | 0.00 | 0.00   | 0.00 | 0.00  | 0.00  | 0.00  | 0.00   | 0.00 | 1.00  | 1.00  | 3.00  | 0.00   | 0.00  | 0.00  | 0.00  |
| PVC               | 0.00 | 0.00   | 0.00 | 0.00  | 0.00  | 0.00  | 0.00   | 0.00 | 0.00  | 0.00  | 0.00  | 1.00   | 0.00  | 1.00  | 0.00  |
| PU                | 0.00 | 0.00   | 0.00 | 0.00  | 0.00  | 0.00  | 0.00   | 0.00 | 0.00  | 0.00  | 1.00  | 2.00   | 1.00  | 0.00  | 0.00  |
| PS                | 0.00 | 0.00   | 0.00 | 1.00  | 1.00  | 0.00  | 9.00   | 1.00 | 0.00  | 0.00  | 0.00  | 2.00   | 0.00  | 3.00  | 2.00  |
| ABS               | 0.00 | 0.00   | 0.00 | 0.00  | 0.00  | 0.00  | 0.00   | 0.00 | 0.00  | 1.00  | 0.00  | 0.00   | 0.00  | 3.00  | 0.00  |
| Epoxy             | 0.00 | 0.00   | 0.00 | 0.00  | 0.00  | 0.00  | 0.00   | 0.00 | 0.00  | 0.00  | 1.00  | 0.00   | 0.00  | 0.00  | 0.00  |
| Cellulose acetate | 0.00 | 2.00   | 0.00 | 0.00  | 0.00  | 0.00  | 0.00   | 0.00 | 0.00  | 0.00  | 0.00  | 3.00   | 3.00  | 1.00  | 0.00  |
| Alkyd             | 0.00 | 21.00  | 0.00 | 13.00 | 0.00  | 2.00  | 0.00   | 0.00 | 0.00  | 15.00 | 2.00  | 12.00  | 21.00 | 8.00  | 4.00  |
| Sum               | 3.00 | 206.00 | 8.00 | 37.00 | 19.00 | 12.00 | 400.00 | 3.00 | 75.00 | 61.00 | 27.00 | 214.00 | 70.00 | 23.00 | 35.00 |
|                   |      |        |      |       |       |       |        | <    | LOD   |       |       |        |       |       |       |
| LOD               |      |        |      |       |       |       | <      |      | <     | LOQ   |       |        |       |       |       |
| LOD; LOQ          |      |        |      |       |       |       | <      |      |       |       |       |        |       |       |       |

**Supplementary Table S1: (A)** The ascertainable limits of detection (LOD) and quantification (LOQ) are determinable through the examination of blank samples, enabling the computation of these values concerning the overall amount of microplastics (MPs); **(B)** Total microplastic concentrations of samples and sampling volumes can be seen; also, colors indicate how samples relate to the LOD and LOQ values (PE: polyethylene; PP: polypropylene; PS: polystyrene; ABS: acrylonitrile butadiene styrene; PA: polyamide; PU: polyurethane; PVC: polyvinyl chloride; LB: Lake Balaton; KB: Kis-Balaton Water Protection System and its catchment area).
